# Supplementary material for: The Arabidopsis thaliana proteome harbors undiscovered multi-domain molecules with functional guanylyl cyclase catalytic centers
Source: PubMed Central journal article supplement (PMC3726316; doi:10.1186/1478-811x-11-48), 2013-07-08
Supplement: 1478-811X-11-48-S1.pdf [file 1478-811X-11-48-S1.pdf]

## ADDITIONAL FILE 1

### Pattern Matching (PatMatch) search parameters:

|                     |                                                                                           |
|---------------------|-------------------------------------------------------------------------------------------|
| Search pattern      | [KS][YF][GCS][VIL][VILFG][DVIL][VILADG][EPVIL][DVIL][TVIL][WST][PDRG][KEG][KR]{2,3}[DHSE] |
| Dataset searched    | TAIR10 Proteins (protein)                                                                 |
| Bytes searched      | 14482855                                                                                  |
| Sequences with hits | 47                                                                                        |
| Hits found          | 47                                                                                        |

### Retrieved hits:

|                               |             |             |                          |                             |             |             |                          |
|-------------------------------|-------------|-------------|--------------------------|-----------------------------|-------------|-------------|--------------------------|
| AT1G16110.1 (AtWAKL6)         | 620         | 636         | SFGVVLVELITGEKPLS        | AT3G02130.1 (AtCLI1)        | 1057        | 1073        | SYGVVLELLSDKKALD         |
| AT1G16120.1 (AtWAKL1)         | 615         | 631         | SFGVVLVELITGEKPLS        | AT3G13380.1 (AtBRI1-L)      | 1047        | 1063        | SYGVILLELLSGKKPID        |
| AT1G16130.1 (AtWAKL2)         | 602         | 618         | SFGVVLVELLTGEKPSS        | AT3G19300.1 (Kinase-L)      | 514         | 530         | SYGVVLEIITGKRAVD         |
| AT1G16160.1 (AtWAKL5)         | 598         | 614         | SFGVVLVELITGEKPLS        | AT3G49670.1 (AtBAM2)        | 878         | 895         | SFGVVLLELITGKKPVGE       |
| AT1G16260.1 (AtWAKL)          | 576         | 592         | SFGVLLIELLTGEKPVS        | AT4G05200.1 (AtCRK22)       | 534         | 550         | SFGVLVLELITGKKNSS        |
| AT1G16260.2 (AtWAKL)          | 576         | 592         | SFGVLLIELLTGEKPVS        | AT4G11530.1 (AtCRK34)       | 532         | 548         | SFGVLVLEIISGKKNSS        |
| AT1G17750.1 (AtPEPR2)         | 981         | 997         | SYGVVLELVTGKRALD         | AT4G13190.1 (Kinase-L)      | 260         | 276         | SFGVVLLELITGKRVID        |
| AT1G28440.1 (AtHSL1)          | 878         | 894         | SFGVVILEIVTRKRVPD        | AT4G21390.1 (AtB120)        | 716         | 732         | SFGVLLLEIVSGKRNTS        |
| AT1G31420.1 (AtFEI1)          | 491         | 507         | SFGVLVLEVLGKRPTD         | AT4G23180.1 (AtCRK10)       | 535         | 551         | SFGVLVLEIISGKKNSS        |
| AT1G31420.2 (AtFEI1)          | 490         | 506         | SFGVLVLEVLGKRPTD         | AT4G23230.1 (AtCRK15)       | 404         | 420         | SFGVLVLEIISGKKNSS        |
| AT1G52540.1 (Kinase)          | 226         | 242         | SFGVLLLELVTGKRPTD        | AT4G23250.1 (AtCRK17)       | 541         | 557         | SFGVLILEIISGKKNSS        |
| AT1G55610.1 (AtBRI1-L)        | 1049        | 1065        | SYGVILLELLSGKKPID        | AT4G23260.1 (AtCRK18)       | 526         | 542         | SFGVLILEIISGKKNSS        |
| AT1G55610.2 (AtBRI1-L)        | 1049        | 1065        | SYGVILLELLSGKKPID        | AT4G23260.2 (AtCRK18)       | 515         | 531         | SFGVLILEIISGKKNSS        |
| AT1G61430.1 (Kinase-L)        | 679         | 695         | SFGVLLLEIISGKKISS        | AT4G23300.1 (AtCRK22)       | 540         | 556         | SFGILILEIISGKKNSS        |
| <b>AT1G62580.1 (AtNOGC1)</b>  | <b>191</b>  | <b>207</b>  | <b>SFSIGLGIDTWPQKQIH</b> | <b>AT4G39400.1 (AtBRI1)</b> | <b>1071</b> | <b>1087</b> | <b>SYGVVLELLTGKRPTD</b>  |
| AT1G69270.1 (AtRPK1)          | 446         | 462         | SYGIVLLELISDKRALD        | <b>AT5G05930.1 (AtGC1)</b>  | <b>32</b>   | <b>48</b>   | <b>KYCLFDDPLVSDGKYRD</b> |
| AT1G69730.1 (AtWAKL)          | 634         | 650         | SFGVVLVELITGEKSIS        | AT5G07180.1 (AtERL2)        | 837         | 853         | SFGIVLLELLTGGKAVD        |
| <b>AT1G73080.1 (AtPEPR1)</b>  | <b>1014</b> | <b>1030</b> | <b>SYGVVLELVTGKRRAVD</b> | AT5G58150.1 (Kinase-L)      | 702         | 719         | SFGVVLLELVSGKKPEGD       |
| AT1G79670.1 (AtWAKL22)        | 607         | 623         | SFGVVLVELITGEKPFS        | AT5G61480.1 (AtPXY)         | 911         | 927         | SYGVILLEIITGKRSVE        |
| AT1G79670.2 (AtWAKL22)        | 570         | 586         | SFGVVLVELITGEKPFS        | AT5G62230.1 (AtERL1)        | 834         | 850         | SFGIVLLELLTGGKAVD        |
| <b>AT1G79680.1 (AtWAKL10)</b> | <b>620</b>  | <b>636</b>  | <b>SFGVLAELITGEKSVS</b>  | AT5G62230.2 (AtERL1)        | 786         | 802         | SFGIVLLELLTGGKAVD        |
| <b>AT2G02220.1 (AtPSKR1)</b>  | <b>921</b>  | <b>937</b>  | <b>SFGVVLLELLTDKRPVD</b> | AT5G62710.1 (Kinase-L)      | 499         | 515         | SFGVLLLELVTGKRPTD        |
| AT2G26290.1 (AtARSK1)         | 280         | 296         | SFGVVLLELITGKRSMO        | AT5G65710.1 (AtHSL2)        | 883         | 899         | SFGVVLLELITGKRPNP        |
| AT2G39660.1 (AtBIK1)          | 264         | 280         | SFGVLLLEILSGKRALD        |                             |             |             |                          |

### Legend:

**Bolded proteins** – Previously reported GCs

### Note:

Leucine-rich repeats (LRR), cysteine-rich kinases (CRK) and wall-associated kinase-like (WAKL) proteins constitute 20, 8 and 9 of the new candidate GCs respectively.
